# Supplementary material for: SARS-CoV-2 vaccine protection and deaths among US veterans during 2021
Source: Atypon-hosted journal article supplement (doi:10.1126/science.abm0620), 2021-11-04
Supplement: science.abm0620_sm.pdf [file science.abm0620_sm.pdf]

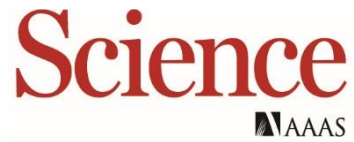

## Supplementary Materials for

### **SARS-CoV-2 vaccine protection and deaths among US veterans during 2021**

Barbara A. Cohn *et al.*

Corresponding author: Arthur W. Wallace, [art.wallace@va.gov](mailto:art.wallace@va.gov)

DOI: [10.1126/science.abm0620](https://doi.org/10.1126/science.abm0620)

#### **The PDF file includes:**

Material and Methods

Fig. S1

Tables S1 to S3

## Materials and Methods

We examined SARS CoV-2 infections and death due to any cause in U.S. Veterans age  $\geq 18$  years and receiving care in the Veterans Health Administration (VHA), the largest integrated health system in the country. After the U.S. Food and Drug Administration issued an emergency use authorization for the Pfizer-BioNTech vaccine in December 2020, the Department of Veterans Affairs (VA) first provided vaccinations to front-line health care workers and Veterans residing in long-term care facilities in 37 of its medical centers across the U.S. As vaccine supplies increased, additional Veterans received vaccinations based on age, existing health conditions, and other factors for increased risk of severe illness or death from COVID-19, and as of October 21, 2021, more than 3.5 million Veterans have been fully vaccinated (available at: <https://www.accesstocare.va.gov/Healthcare/COVID19NationalSummary>).

We used the VA Corporate Data Warehouse (CDW) to identify vaccination status (fully vaccinated vs. unvaccinated), vaccine type (Pfizer-BioNTech, Moderna, Janssen), SARS CoV-2 infections, and deaths due to any cause during the period February 1, 2021 to October 1, 2021. We focused on this time period because it encompasses the time when many Veterans became fully vaccinated (i.e., vaccine eligibility extended beyond long-term care facilities) and the mid-summer 2021 surge in cases in the U.S. The VA CDW provides discrete, individual-level data, including demographics, administrative claims-based diagnosis and procedure codes, prescriptions, anthropometric measures, and free-text data including procedure notes and pathology reports; data include all 50 states and U.S. territories.

Fully vaccinated was defined as two doses of Pfizer-BioNTech or Moderna or one dose of Janssen vaccines, administered at the appropriate intervals. We excluded partial vaccinations and vaccinations that were administered off-label and/or not according to recommendation. We did not consider booster vaccines as the study period largely precedes authorization for boosters in the U.S.

SARS-CoV-2 infection was defined as the detection of SARS-CoV-2 on most recent reverse-transcriptase–polymerase-chain-reaction (RT-PCR) assay, regardless of symptoms or test setting. The reason for RT-PCR assay is not provided in the VA CDW. Veterans may have received a RT-PCR assay for many reasons, including but not limited to, concern about exposure, symptoms, as a requirement of a clinic visit or in advanced of a medical procedure, or as part of a hospital admission. We included assays received for any reason or in any clinical setting.

Deaths due to any cause (n=22,345) were identified using a combination of data from the Master Veteran Index, vital status files, and medical records (hierarchical in that order). These data include deaths that occurred both inside and outside the VHA.

Vaccine effectiveness (1- adjusted hazard ratio [aHR] x 100) against infection was estimated using Cox proportional hazards models, overall and by vaccine type (Pfizer-BioNTech vs. Moderna vs. Janssen), with vaccination status modeled as time-varying. Modeling vaccination as time-varying assigns follow-up time for Veterans before the date of full vaccination (defined as 14 days after receipt of the second dose of Pfizer-BioNTech or Moderna or one dose of Janssen vaccines) as unvaccinated time and time after the date of full vaccination as vaccinated time; those never vaccinated contribute only unvaccinated time. We required Veterans to receive a RT-PCR assay to contribute vaccinated and/or unvaccinated follow-up time, such that Veterans who received a recent RT-PCR assay before vaccination contributed unvaccinated time only. Veterans in both groups were followed from February 1, 2021 until their most recent RT-PCR assay or October 1, 2021. We used calendar time as the underlying time scale to allow the baseline hazard to vary flexibly as vaccine eligibility, testing practices, non-pharmaceutical interventions, and infection transmission changed over time. As noted by others (31), models with calendar time as the underlying time scale compare those who are unvaccinated on each calendar date to those who are vaccinated on that same date.

We report aHR and 95% confidence intervals (CI), adjusted for age, sex and comorbidity. Comorbidity was measured using the Charlson comorbidity index (26), and a diagnosis of diabetes, chronic obstructive pulmonary disease, bronchitis, acute respiratory failure, chronic lung disease, cardiovascular disease in the two years prior to the RT-PCR assay. We also examined time dependence by including product terms for vaccination status by the log of follow-up time, with  $p < 0.01$  indicating statistical significance.

To illustrate findings, we plotted cumulative risk of infection using Kaplan-Meier estimation to account for censoring, overall and by vaccination status and age group (<50 years, 50-64 years, and  $\geq 65$  years). We used the same time-varying assignment described above allowing individuals to contribute time before and after vaccination and allowing for changes in RT-PCR status. Thus, as described above for Cox models, the time scale compares those who are unvaccinated on each calendar date to those who are vaccinated on that same date. We selected these age groups because they correspond to the phased-in eligibility for vaccination.

We examined vaccine effectiveness against death in a nested sample ( $n=775,536$ ) of Veterans who were: 1) unvaccinated and received an RT-PCR assay from February 1, 2021 to September 30, 2021; or 2) fully vaccinated and received an RT-PCR assay after the date of full vaccination during the same period. We plotted cumulative risk of death due to any cause using Kaplan-Meier estimation, separately by age group (<65 vs.  $\geq 65$  years) and comorbidity score (Charlson Comorbidity Index, <3 vs.  $\geq 3$ ) (26). Follow-up was accrued from the date of RT-PCR assay until death or October 1, 2021. In addition, we used Cox proportional hazards models to examine vaccine effectiveness against death during the period corresponding to the emergence and dominance of the Delta variant in the U.S. We limited the nested sample for this analysis to RT-PCR assays on or after July 1, 2021 ( $n=312,829$ ) and report aHR and 95% CI.

All analyses were conducted using SAS Enterprise Guide 7.1 (SAS Institute, Cary, NC). This study was approved by the Institutional Review Board at the University of California San Francisco and the Public Health Institute, as well as the San Francisco VA Research and Development Committee.

**Supplementary Table 1. Distribution of SARS-CoV-2 infection by demographics and vaccination status in 780,225 U.S. Veterans, February 1, 2021 to October 1, 2021**

|                                                                       |                                        | Most recent RT-PCR <sup>1</sup> |                 |
|-----------------------------------------------------------------------|----------------------------------------|---------------------------------|-----------------|
|                                                                       |                                        | Negative                        | Positive (%)    |
| <b>Vaccination status<sup>2</sup></b>                                 |                                        |                                 |                 |
|                                                                       | Unvaccinated                           | 209,439                         | 72,638 (25.8%)  |
|                                                                       | Janssen                                | 28,717                          | 6,945 (19.5%)   |
|                                                                       | Moderna                                | 206,420                         | 24,342 (10.6%)  |
|                                                                       | Pfizer-BioNTech                        | 204,044                         | 27,680 (12.0%)  |
| <b>Sex</b>                                                            |                                        |                                 |                 |
|                                                                       | Female                                 | 91,535                          | 20,424 (18.2%)  |
|                                                                       | Male                                   | 557,085                         | 111,181 (16.6%) |
| <b>Ethnicity</b>                                                      |                                        |                                 |                 |
|                                                                       | Hispanic                               | 49,050                          | 10,753 (18.0%)  |
|                                                                       | Non-Hispanic                           | 599,570                         | 120,852 (16.8%) |
| <b>Race</b>                                                           |                                        |                                 |                 |
|                                                                       | American Indian/Alaska Native          | 4,884                           | 1,087 (18.2%)   |
|                                                                       | Asian                                  | 6,816                           | 1,147 (14.4%)   |
|                                                                       | Black or African American              | 142,197                         | 26,282 (15.6%)  |
|                                                                       | Native Hawaiian/Other Pacific Islander | 5,563                           | 1,206 (17.8%)   |
|                                                                       | White                                  | 421,726                         | 86,332 (17.0%)  |
| <b>Age at RT-PCR (years)</b>                                          |                                        |                                 |                 |
|                                                                       | <50                                    | 144,338                         | 41,099 (22.2%)  |
|                                                                       | 50-64                                  | 185,155                         | 37,831 (17.0%)  |
|                                                                       | ≥65                                    | 319,127                         | 52,675 (14.2%)  |
| <b>Comorbidity score<sup>3</sup><br/>(Charlson Comorbidity Index)</b> |                                        |                                 |                 |
|                                                                       | 0                                      | 253,896                         | 60,263 (19.2%)  |
|                                                                       | 1-2                                    | 218,042                         | 41,595 (16.0%)  |
|                                                                       | 3-4                                    | 102,372                         | 16,988 (14.2%)  |
|                                                                       | ≥5                                     | 74,310                          | 12,759 (14.6%)  |

<sup>1</sup>For vaccinated Veterans, RT-PCR assessed 15 days after last dose that established full vaccination status; for unvaccinated Veterans, RT-PCR assessed beginning in February 1, 2021, coincident with broadscale vaccine eligibility in the VA. <sup>2</sup>Vaccination status defined as: 1) a single Janssen vaccine; 2) two Moderna vaccines or 3) two Pfizer-BioNTech vaccines. <sup>3</sup>Pre-existing morbidity as represented by the Charlson Comorbidity Index reported within 2 years of first RT-PCR test or hospitalization related to first RT-PCR test.

**Supplementary Table 2. Distribution of vaccine type by demographics among 498,148 fully vaccinated U.S. Veterans, February 1, 2021 to October 1, 2021**

|                                        | Vaccine Type <sup>1</sup> |                 |                 |
|----------------------------------------|---------------------------|-----------------|-----------------|
|                                        | Janssen (%)               | Moderna (%)     | Pfizer (%)      |
| <b>Total Vaccinated</b>                | 35,662 (7.2%)             | 230,762 (46.3%) | 231,724 (46.5%) |
| February                               | 30 (0.0%)                 | 32,114 (41.3%)  | 45,675 (58.7%)  |
| March                                  | 5,862 (3.6%)              | 86,107 (52.2%)  | 72,828 (44.2%)  |
| April                                  | 10,732 (7.6%)             | 65,530 (46.1%)  | 65,852 (46.3%)  |
| May                                    | 4,057 (7.0%)              | 27,986 (48.5%)  | 25,651 (44.5%)  |
| June                                   | 5,844 (24.0%)             | 9,176 (37.7%)   | 9,305 (38.3%)   |
| July                                   | 3,358 (29.6%)             | 3,694 (32.5%)   | 4,305 (37.9%)   |
| August                                 | 3,645 (37.4%)             | 2,491 (25.5%)   | 3,621 (37.1%)   |
| September                              | 2,143 (20.8%)             | 3,664 (35.6%)   | 4,487 (43.6%)   |
| <b>Sex</b>                             |                           |                 |                 |
| Female                                 | 3,884 (8.1%)              | 19,752 (41.2%)  | 24,295 (50.7%)  |
| Male                                   | 31,778 (7.1%)             | 211,010 (46.9%) | 207,429 (46.1%) |
| <b>Ethnicity</b>                       |                           |                 |                 |
| Hispanic                               | 2,703 (6.7%)              | 19,659 (48.9%)  | 17,842 (44.4%)  |
| Non-Hispanic                           | 32,959 (7.2%)             | 211,103 (46.1%) | 213,882 (46.7%) |
| <b>Race</b>                            |                           |                 |                 |
| American Indian/Alaska Native          | 316 (8.5%)                | 1,746 (47.0%)   | 1,657 (44.6%)   |
| Asian                                  | 349 (6.4%)                | 2,382 (43.4%)   | 2,753 (50.2%)   |
| Black or African American              | 7,499 (6.4%)              | 44,476 (38.2%)  | 64,425 (55.4%)  |
| Native Hawaiian/Other Pacific Islander | 295 (6.7%)                | 1,973 (44.8%)   | 2,131 (48.4%)   |
| White                                  | 24,900 (7.4%)             | 166,448 (49.3%) | 146,199 (43.3%) |
| <b>Age (years)</b>                     |                           |                 |                 |
| <50                                    | 8,855 (12.8%)             | 26,253 (38.0%)  | 33,981 (49.2%)  |
| 50-64                                  | 13,823 (10.0%)            | 59,240 (43.0%)  | 64,644 (46.9%)  |
| ≥65                                    | 12,984 (4.5%)             | 145,269 (49.9%) | 291,352 (58.5%) |

<sup>1</sup>Vaccination status defined as: 1) a single Janssen vaccine; 2) two Moderna vaccines or 3) two Pfizer-BioNTech vaccines

Supplementary Table 3A: RT-PCR Assays by Vaccination Status and Week, February 1 – October 1, 2021 (used for Figure 2A): All Ages

|      |  | Unvaccinated |       | Vaccinated |      |         |      |                 |      |
|------|--|--------------|-------|------------|------|---------|------|-----------------|------|
|      |  |              |       | Janssen    |      | Moderna |      | Pfizer-BioNTech |      |
| Week |  | PCR+         | PCR-  | PCR+       | PCR- | PCR+    | PCR- | PCR+            | PCR- |
| 1    |  | 6543         | 17817 | 0          | 0    | 31      | 83   | 24              | 113  |
| 2    |  | 4557         | 16543 | 0          | 0    | 32      | 171  | 45              | 329  |
| 3    |  | 5132         | 20736 | 0          | 1    | 86      | 650  | 124             | 866  |
| 4    |  | 4548         | 18848 | 0          | 0    | 111     | 1062 | 146             | 1448 |
| 5    |  | 3176         | 18010 | 0          | 0    | 109     | 1402 | 179             | 1978 |
| 6    |  | 3639         | 16699 | 1          | 6    | 180     | 1992 | 236             | 2536 |
| 7    |  | 3739         | 16623 | 9          | 79   | 261     | 2611 | 272             | 2935 |
| 8    |  | 3615         | 14775 | 29         | 137  | 293     | 3221 | 330             | 3297 |
| 9    |  | 3607         | 14534 | 38         | 189  | 348     | 3853 | 391             | 4015 |
| 10   |  | 3619         | 13969 | 55         | 259  | 408     | 4555 | 485             | 4498 |
| 11   |  | 3231         | 13401 | 67         | 369  | 454     | 5009 | 530             | 5029 |
| 12   |  | 2915         | 11258 | 104        | 406  | 475     | 5481 | 569             | 5609 |
| 13   |  | 1608         | 9855  | 50         | 458  | 176     | 5513 | 196             | 5606 |
| 14   |  | 1388         | 9350  | 26         | 425  | 158     | 5762 | 183             | 5900 |
| 15   |  | 1178         | 8425  | 27         | 458  | 173     | 5920 | 153             | 6018 |
| 16   |  | 968          | 7427  | 29         | 462  | 147     | 5491 | 133             | 5605 |
| 17   |  | 772          | 6884  | 32         | 449  | 150     | 5498 | 147             | 5563 |
| 18   |  | 754          | 7689  | 30         | 583  | 135     | 6312 | 123             | 6384 |
| 19   |  | 675          | 7178  | 31         | 553  | 162     | 5984 | 130             | 6368 |
| 20   |  | 699          | 7284  | 32         | 626  | 129     | 6320 | 144             | 6166 |
| 21   |  | 703          | 6663  | 34         | 591  | 136     | 5788 | 145             | 5685 |
| 22   |  | 835          | 6681  | 39         | 613  | 150     | 5982 | 180             | 5831 |
| 23   |  | 1378         | 8265  | 72         | 794  | 230     | 7215 | 376             | 6822 |
| 24   |  | 1989         | 9216  | 91         | 841  | 371     | 7592 | 503             | 7187 |
| 25   |  | 2923         | 10112 | 158        | 874  | 471     | 7860 | 711             | 7563 |
| 26   |  | 3840         | 11371 | 258        | 996  | 756     | 8699 | 1077            | 8410 |
| 27   |  | 4621         | 11740 | 285        | 1068 | 896     | 8942 | 1268            | 8792 |
| 28   |  | 4721         | 6532  | 321        | 629  | 989     | 4980 | 1353            | 4568 |
| 29   |  | 4632         | 5112  | 333        | 525  | 1149    | 3752 | 1378            | 3252 |
| 30   |  | 4488         | 4574  | 330        | 478  | 1054    | 3477 | 1305            | 3012 |
| 31   |  | 3486         | 4015  | 263        | 439  | 855     | 3344 | 1009            | 2774 |
| 32   |  | 3136         | 4494  | 268        | 481  | 880     | 3696 | 1037            | 3221 |
| 33   |  | 2452         | 4154  | 180        | 465  | 758     | 3536 | 803             | 3081 |
| 34   |  | 1966         | 3993  | 162        | 462  | 649     | 3280 | 646             | 2937 |

NOTE: Because vaccination status was modeled as a time-varying covariate (see Materials and Methods), Veterans could contribute both vaccinated and unvaccinated time. Therefore, the total number of observations in the table does not represent the unique number of Veterans.



Supplementary Table 3B: RT-PCR Assays by Vaccination Status and Week, February 1 – October 1, 2021 (used for Figure 2B): Age <50 years

|      |  | Unvaccinated |      | Vaccinated |      |         |      |                 |      |
|------|--|--------------|------|------------|------|---------|------|-----------------|------|
|      |  | PCR+         | PCR- | Janssen    |      | Moderna |      | Pfizer-BioNTech |      |
| Week |  | PCR+         | PCR- | PCR+       | PCR- | PCR+    | PCR- | PCR+            | PCR- |
| 1    |  | 1598         | 4162 | 0          | 0    | 3       | 21   | 2               | 12   |
| 2    |  | 1136         | 3582 | 0          | 0    | 3       | 28   | 5               | 16   |
| 3    |  | 1316         | 4542 | 0          | 0    | 6       | 53   | 6               | 48   |
| 4    |  | 1266         | 4098 | 0          | 0    | 6       | 53   | 9               | 70   |
| 5    |  | 995          | 4016 | 0          | 0    | 9       | 81   | 8               | 86   |
| 6    |  | 1093         | 4006 | 0          | 1    | 10      | 97   | 13              | 93   |
| 7    |  | 1236         | 4183 | 1          | 11   | 23      | 135  | 18              | 122  |
| 8    |  | 1241         | 4151 | 9          | 20   | 18      | 154  | 25              | 149  |
| 9    |  | 1337         | 4174 | 6          | 37   | 20      | 168  | 23              | 212  |
| 10   |  | 1335         | 4357 | 11         | 39   | 33      | 243  | 43              | 286  |
| 11   |  | 1289         | 4487 | 12         | 71   | 43      | 307  | 35              | 365  |
| 12   |  | 1053         | 3929 | 18         | 93   | 28      | 344  | 63              | 485  |
| 13   |  | 627          | 3520 | 11         | 104  | 10      | 397  | 14              | 546  |
| 14   |  | 488          | 3447 | 5          | 83   | 11      | 475  | 20              | 575  |
| 15   |  | 411          | 2934 | 3          | 90   | 14      | 493  | 18              | 643  |
| 16   |  | 343          | 2672 | 2          | 84   | 16      | 427  | 19              | 599  |
| 17   |  | 279          | 2406 | 4          | 95   | 10      | 489  | 23              | 620  |
| 18   |  | 262          | 2691 | 5          | 134  | 10      | 524  | 12              | 733  |
| 19   |  | 240          | 2488 | 6          | 117  | 17      | 513  | 20              | 703  |
| 20   |  | 263          | 2559 | 7          | 117  | 16      | 535  | 23              | 687  |
| 21   |  | 296          | 2313 | 11         | 115  | 19      | 502  | 19              | 605  |
| 22   |  | 371          | 2437 | 9          | 118  | 18      | 521  | 23              | 716  |
| 23   |  | 631          | 3127 | 19         | 165  | 23      | 709  | 55              | 852  |
| 24   |  | 974          | 3742 | 21         | 167  | 48      | 720  | 77              | 896  |
| 25   |  | 1458         | 4186 | 36         | 199  | 65      | 805  | 106             | 1068 |
| 26   |  | 1870         | 5025 | 73         | 242  | 104     | 1002 | 210             | 1256 |
| 27   |  | 2153         | 5315 | 84         | 267  | 112     | 1086 | 204             | 1251 |
| 28   |  | 2104         | 2966 | 84         | 149  | 117     | 591  | 218             | 718  |
| 29   |  | 2082         | 2311 | 94         | 132  | 128     | 491  | 180             | 527  |
| 30   |  | 2032         | 2089 | 96         | 129  | 129     | 435  | 179             | 522  |
| 31   |  | 1528         | 1805 | 61         | 104  | 100     | 419  | 157             | 451  |
| 32   |  | 1342         | 2012 | 61         | 109  | 86      | 454  | 157             | 526  |
| 33   |  | 987          | 1833 | 43         | 115  | 76      | 433  | 115             | 478  |
| 34   |  | 798          | 1639 | 46         | 100  | 59      | 389  | 71              | 469  |

NOTE: Because vaccination status was modeled as a time-varying covariate (see Materials and Methods), Veterans could contribute both vaccinated and unvaccinated time. Therefore, the total number of observations in the table does not represent the unique number of Veterans.

Supplementary Table 3C: RT-PCR Assays by Vaccination Status and Week, February 1 – October 1, 2021 (used for Figure 2C): Age 50-64 years

| Week | Unvaccinated |      | Vaccinated |      |         |      |                 |      |
|------|--------------|------|------------|------|---------|------|-----------------|------|
|      | PCR+         | PCR- | Janssen    |      | Moderna |      | Pfizer-BioNTech |      |
|      | PCR+         | PCR- | PCR+       | PCR- | PCR+    | PCR- | PCR+            | PCR- |
| 1    | 1838         | 5223 | 0          | 0    | 9       | 24   | 5               | 21   |
| 2    | 1368         | 4621 | 0          | 0    | 8       | 49   | 4               | 57   |
| 3    | 1501         | 5677 | 0          | 0    | 24      | 124  | 23              | 125  |
| 4    | 1377         | 5360 | 0          | 0    | 23      | 177  | 29              | 183  |
| 5    | 945          | 5335 | 0          | 0    | 22      | 209  | 34              | 293  |
| 6    | 1172         | 5165 | 1          | 3    | 31      | 275  | 32              | 340  |
| 7    | 1218         | 5277 | 5          | 29   | 35      | 367  | 42              | 434  |
| 8    | 1176         | 4967 | 15         | 61   | 56      | 478  | 60              | 514  |
| 9    | 1108         | 4985 | 15         | 78   | 60      | 595  | 79              | 748  |
| 10   | 1165         | 4921 | 24         | 119  | 89      | 808  | 116             | 971  |
| 11   | 982          | 4726 | 22         | 158  | 113     | 975  | 141             | 1148 |
| 12   | 916          | 3863 | 39         | 156  | 111     | 1233 | 158             | 1453 |
| 13   | 477          | 3290 | 18         | 182  | 43      | 1215 | 46              | 1464 |
| 14   | 432          | 3047 | 10         | 169  | 39      | 1377 | 38              | 1562 |
| 15   | 370          | 2705 | 8          | 195  | 36      | 1422 | 36              | 1627 |
| 16   | 289          | 2359 | 17         | 184  | 27      | 1345 | 25              | 1432 |
| 17   | 231          | 2220 | 10         | 180  | 31      | 1334 | 38              | 1524 |
| 18   | 212          | 2463 | 13         | 225  | 31      | 1573 | 37              | 1657 |
| 19   | 193          | 2201 | 12         | 216  | 39      | 1494 | 24              | 1729 |
| 20   | 214          | 2333 | 10         | 260  | 31      | 1545 | 38              | 1693 |
| 21   | 199          | 2125 | 12         | 236  | 27      | 1341 | 36              | 1566 |
| 22   | 249          | 2128 | 20         | 267  | 38      | 1510 | 44              | 1589 |
| 23   | 405          | 2645 | 17         | 321  | 45      | 1757 | 103             | 1869 |
| 24   | 567          | 2930 | 37         | 338  | 88      | 1953 | 139             | 1997 |
| 25   | 839          | 3319 | 72         | 355  | 113     | 2047 | 203             | 2090 |
| 26   | 1072         | 3701 | 99         | 412  | 178     | 2230 | 284             | 2345 |
| 27   | 1412         | 3760 | 107        | 438  | 209     | 2365 | 339             | 2559 |
| 28   | 1432         | 1990 | 111        | 245  | 236     | 1247 | 324             | 1265 |
| 29   | 1355         | 1519 | 125        | 212  | 266     | 906  | 341             | 890  |
| 30   | 1259         | 1365 | 115        | 181  | 244     | 833  | 345             | 769  |
| 31   | 1020         | 1204 | 111        | 164  | 198     | 838  | 234             | 689  |
| 32   | 904          | 1348 | 113        | 177  | 190     | 895  | 249             | 843  |
| 33   | 758          | 1205 | 72         | 170  | 165     | 824  | 203             | 794  |
| 34   | 605          | 1207 | 64         | 178  | 128     | 775  | 148             | 759  |

NOTE: Because vaccination status was modeled as a time-varying covariate (see Materials and Methods), Veterans could contribute both vaccinated and unvaccinated time. Therefore, the total number of observations in the table does not represent the unique number of Veterans.

Supplementary Table 3D: RT-PCR Assays by Vaccination Status and Week, February 1 – October 1, 2021 (used for Figure 2D): Age >65 years

| Week | Unvaccinated |       | Vaccinated |      |         |      |                 |      |
|------|--------------|-------|------------|------|---------|------|-----------------|------|
|      | PCR+         | PCR-  | Janssen    |      | Moderna |      | Pfizer-BioNTech |      |
|      | PCR+         | PCR-  | PCR+       | PCR- | PCR+    | PCR- | PCR+            | PCR- |
| 1    | 3107         | 8432  | 0          | 0    | 19      | 38   | 17              | 80   |
| 2    | 2053         | 8340  | 0          | 0    | 21      | 94   | 36              | 256  |
| 3    | 2315         | 10517 | 0          | 1    | 56      | 473  | 95              | 693  |
| 4    | 1905         | 9390  | 0          | 0    | 82      | 832  | 108             | 1195 |
| 5    | 1236         | 8659  | 0          | 0    | 78      | 1112 | 137             | 1599 |
| 6    | 1374         | 7528  | 0          | 2    | 139     | 1620 | 191             | 2103 |
| 7    | 1285         | 7163  | 3          | 39   | 203     | 2108 | 212             | 2379 |
| 8    | 1198         | 5657  | 5          | 56   | 219     | 2589 | 245             | 2634 |
| 9    | 1162         | 5375  | 17         | 74   | 268     | 3090 | 289             | 3055 |
| 10   | 1119         | 4691  | 20         | 101  | 286     | 3504 | 326             | 3241 |
| 11   | 960          | 4188  | 33         | 140  | 298     | 3727 | 354             | 3516 |
| 12   | 946          | 3466  | 47         | 157  | 336     | 3904 | 348             | 3671 |
| 13   | 504          | 3045  | 21         | 172  | 123     | 3901 | 136             | 3596 |
| 14   | 468          | 2856  | 11         | 173  | 108     | 3910 | 125             | 3763 |
| 15   | 397          | 2786  | 16         | 173  | 123     | 4005 | 99              | 3748 |
| 16   | 336          | 2396  | 10         | 194  | 104     | 3719 | 89              | 3574 |
| 17   | 262          | 2258  | 18         | 174  | 109     | 3675 | 86              | 3419 |
| 18   | 280          | 2535  | 12         | 224  | 94      | 4215 | 74              | 3994 |
| 19   | 242          | 2489  | 13         | 220  | 106     | 3977 | 86              | 3936 |
| 20   | 222          | 2392  | 15         | 249  | 82      | 4240 | 83              | 3786 |
| 21   | 208          | 2225  | 11         | 240  | 90      | 3945 | 90              | 3514 |
| 22   | 215          | 2116  | 10         | 228  | 94      | 3951 | 113             | 3526 |
| 23   | 342          | 2493  | 36         | 308  | 162     | 4749 | 218             | 4101 |
| 24   | 448          | 2544  | 33         | 336  | 235     | 4919 | 287             | 4294 |
| 25   | 626          | 2607  | 50         | 320  | 293     | 5008 | 402             | 4405 |
| 26   | 898          | 2645  | 86         | 342  | 474     | 5467 | 583             | 4809 |
| 27   | 1056         | 2665  | 94         | 363  | 575     | 5491 | 725             | 4982 |
| 28   | 1185         | 1576  | 126        | 235  | 636     | 3142 | 811             | 2585 |
| 29   | 1195         | 1282  | 114        | 181  | 755     | 2355 | 857             | 1835 |
| 30   | 1197         | 1120  | 119        | 168  | 681     | 2209 | 781             | 1721 |
| 31   | 938          | 1006  | 91         | 171  | 557     | 2087 | 618             | 1634 |
| 32   | 890          | 1134  | 94         | 195  | 604     | 2347 | 631             | 1852 |
| 33   | 707          | 1116  | 65         | 180  | 517     | 2279 | 485             | 1809 |
| 34   | 563          | 1147  | 52         | 184  | 462     | 2116 | 427             | 1709 |

NOTE: Because vaccination status was modeled as a time-varying covariate (see Materials and Methods), Veterans could contribute both vaccinated and unvaccinated time. Therefore, the total number of observations in the table does not represent the unique number of Veterans.

Supplementary Table 3E: Vital Status by Vaccination Status, RT-PCR Assay, and from RT-PCR Assay, Beginning February 1, 2021 (used for Figure 3A): Age <65 years

|                         | Unvaccinated |            |        |            | Vaccinated |            |        |            |
|-------------------------|--------------|------------|--------|------------|------------|------------|--------|------------|
|                         | PCR-         |            | PCR +  |            | PCR-       |            | PCR +  |            |
| Weeks from RT-PCR Assay | Deaths       | Non-Deaths | Deaths | Non-Deaths | Deaths     | Non-Deaths | Deaths | Non-Deaths |
| 1                       | 95           | 3932       | 74     | 1811       | 55         | 3747       | 11     | 677        |
| 2                       | 164          | 3002       | 192    | 1731       | 92         | 2839       | 14     | 673        |
| 3                       | 133          | 3285       | 173    | 2217       | 107        | 3068       | 9      | 853        |
| 4                       | 120          | 2923       | 126    | 2497       | 91         | 2729       | 11     | 861        |
| 5                       | 119          | 3297       | 88     | 3203       | 97         | 2990       | 17     | 1101       |
| 6                       | 102          | 3622       | 43     | 3329       | 89         | 3315       | 4      | 1129       |
| 7                       | 80           | 4648       | 27     | 3380       | 87         | 4457       | 7      | 1082       |
| 8                       | 78           | 8459       | 23     | 3397       | 83         | 8480       | 5      | 1048       |
| 9                       | 68           | 8036       | 15     | 2778       | 74         | 8075       | 3      | 937        |
| 10                      | 64           | 6770       | 8      | 2157       | 66         | 7172       | 1      | 594        |
| 11                      | 44           | 5949       | 8      | 1413       | 62         | 6678       | 1      | 404        |
| 12                      | 50           | 5024       | 9      | 950        | 71         | 6266       | 3      | 258        |
| 13                      | 43           | 3845       | 8      | 562        | 41         | 5276       | 4      | 149        |
| 14                      | 33           | 3669       | 7      | 453        | 33         | 4941       | 0      | 124        |
| 15                      | 29           | 4015       | 9      | 427        | 32         | 5466       | 2      | 122        |
| 16                      | 25           | 3741       | 4      | 380        | 31         | 5513       | 0      | 117        |
| 17                      | 21           | 4035       | 5      | 403        | 32         | 5674       | 1      | 106        |
| 18                      | 21           | 3502       | 6      | 417        | 24         | 5048       | 3      | 114        |
| 19                      | 12           | 3672       | 4      | 519        | 28         | 5028       | 1      | 105        |
| 20                      | 20           | 3951       | 8      | 638        | 19         | 5668       | 1      | 114        |
| 21                      | 18           | 4394       | 4      | 731        | 15         | 5747       | 1      | 122        |
| 22                      | 18           | 4301       | 3      | 848        | 22         | 5737       | 0      | 139        |
| 23                      | 20           | 4562       | 1      | 1404       | 14         | 5989       | 1      | 414        |
| 24                      | 12           | 4845       | 4      | 1554       | 10         | 5869       | 1      | 362        |
| 25                      | 12           | 4476       | 4      | 1634       | 14         | 5935       | 0      | 307        |
| 26                      | 9            | 4255       | 3      | 1522       | 15         | 5556       | 0      | 198        |

NOTE: Numbers in table correspond to Kaplan-Meier curves shown in Figure 3 which were truncated at 26 weeks to avoid incomplete follow-up and sparse data. Therefore, the total number of observations in the table does not represent the total nested sample given in Materials and Methods.

Supplementary Table 3F: Vital Status by Vaccination Status, RT-PCR Assay, and Week from RT-PCR Assay, Beginning February 1, 2021 (used for Figure 3B): Age  $\geq 65$  years

|                         | Unvaccinated |            |        |            | Vaccinated |            |        |            |
|-------------------------|--------------|------------|--------|------------|------------|------------|--------|------------|
|                         | PCR-         |            | PCR +  |            | PCR-       |            | PCR +  |            |
| Weeks from RT-PCR Assay | Deaths       | Non-Deaths | Deaths | Non-Deaths | Deaths     | Non-Deaths | Deaths | Non-Deaths |
| 1                       | 390          | 1542       | 348    | 708        | 459        | 5760       | 102    | 1241       |
| 2                       | 698          | 1100       | 725    | 661        | 996        | 4267       | 237    | 1046       |
| 3                       | 614          | 1102       | 670    | 821        | 959        | 4360       | 210    | 1300       |
| 4                       | 530          | 953        | 401    | 852        | 813        | 3870       | 128    | 1210       |
| 5                       | 436          | 1038       | 227    | 1059       | 756        | 4114       | 82     | 1508       |
| 6                       | 355          | 1190       | 147    | 1032       | 665        | 4368       | 63     | 1648       |
| 7                       | 301          | 1405       | 92     | 1011       | 564        | 5961       | 29     | 1488       |
| 8                       | 276          | 2367       | 58     | 872        | 500        | 10820      | 19     | 1330       |
| 9                       | 216          | 2280       | 63     | 729        | 449        | 10616      | 23     | 1084       |
| 10                      | 192          | 2166       | 40     | 477        | 375        | 9777       | 17     | 692        |
| 11                      | 180          | 2097       | 41     | 348        | 324        | 9563       | 13     | 517        |
| 12                      | 163          | 2033       | 46     | 260        | 300        | 9179       | 16     | 395        |
| 13                      | 114          | 1691       | 24     | 175        | 254        | 7676       | 17     | 203        |
| 14                      | 113          | 1719       | 26     | 160        | 222        | 7698       | 13     | 170        |
| 15                      | 87           | 1820       | 30     | 179        | 219        | 8341       | 12     | 166        |
| 16                      | 67           | 1854       | 28     | 193        | 191        | 8207       | 7      | 197        |
| 17                      | 65           | 1822       | 25     | 213        | 173        | 8563       | 8      | 167        |
| 18                      | 55           | 1564       | 21     | 188        | 129        | 7364       | 8      | 195        |
| 19                      | 56           | 1557       | 22     | 244        | 134        | 7657       | 12     | 186        |
| 20                      | 50           | 1784       | 16     | 276        | 112        | 8222       | 10     | 220        |
| 21                      | 52           | 1710       | 16     | 307        | 103        | 8228       | 8      | 230        |
| 22                      | 44           | 1732       | 16     | 332        | 103        | 8179       | 10     | 259        |
| 23                      | 33           | 1777       | 17     | 523        | 92         | 8422       | 6      | 682        |
| 24                      | 28           | 1761       | 13     | 515        | 70         | 8391       | 2      | 646        |
| 25                      | 28           | 1821       | 10     | 559        | 73         | 8179       | 2      | 585        |
| 26                      | 15           | 1637       | 15     | 513        | 48         | 7925       | 5      | 541        |

NOTE: Numbers in table correspond to Kaplan-Meier curves shown in Figure 3 which were truncated at 26 weeks to avoid incomplete follow-up and sparse data. Therefore, the total number of observations in the table does not represent the total nested sample given in Materials and Methods.

Supplementary Table 3G: Vital Status by Vaccination Status, RT-PCR Assay, and Week from RT-PCR Assay, Beginning February 1, 2021 (used for Figure 3C): Charlson Comorbidity Index score <3

| Weeks from RT-PCR Assay | Unvaccinated |            |        |            | Vaccinated |            |        |            |
|-------------------------|--------------|------------|--------|------------|------------|------------|--------|------------|
|                         | PCR-         |            | PCR +  |            | PCR-       |            | PCR +  |            |
|                         | Deaths       | Non-Deaths | Deaths | Non-Deaths | Deaths     | Non-Deaths | Deaths | Non-Deaths |
| 1                       | 238          | 4881       | 209    | 2203       | 195        | 7051       | 31     | 1239       |
| 2                       | 382          | 3725       | 485    | 2080       | 384        | 5387       | 80     | 1133       |
| 3                       | 339          | 3953       | 462    | 2656       | 375        | 5588       | 80     | 1454       |
| 4                       | 294          | 3515       | 294    | 2945       | 292        | 4982       | 46     | 1362       |
| 5                       | 236          | 3961       | 178    | 3766       | 296        | 5372       | 27     | 1787       |
| 6                       | 202          | 4375       | 103    | 3902       | 261        | 5795       | 17     | 1841       |
| 7                       | 179          | 5423       | 60     | 3897       | 219        | 7462       | 10     | 1723       |
| 8                       | 164          | 9542       | 34     | 3792       | 196        | 13031      | 5      | 1593       |
| 9                       | 120          | 9084       | 35     | 3153       | 174        | 12549      | 8      | 1390       |
| 10                      | 122          | 7782       | 18     | 2374       | 148        | 11097      | 9      | 866        |
| 11                      | 105          | 6890       | 23     | 1580       | 123        | 10559      | 6      | 630        |
| 12                      | 106          | 5954       | 18     | 1078       | 114        | 9972       | 2      | 423        |
| 13                      | 63           | 4620       | 10     | 651        | 102        | 8305       | 4      | 214        |
| 14                      | 69           | 4401       | 15     | 514        | 95         | 8069       | 5      | 189        |
| 15                      | 53           | 4856       | 18     | 524        | 87         | 8871       | 3      | 185        |
| 16                      | 49           | 4602       | 10     | 482        | 79         | 8953       | 1      | 208        |
| 17                      | 44           | 4854       | 10     | 513        | 76         | 9263       | 2      | 181        |
| 18                      | 41           | 4199       | 7      | 509        | 60         | 8090       | 2      | 192        |
| 19                      | 38           | 4388       | 11     | 651        | 69         | 8288       | 3      | 186        |
| 20                      | 32           | 4778       | 10     | 777        | 44         | 9218       | 1      | 196        |
| 21                      | 38           | 5230       | 8      | 878        | 42         | 9298       | 3      | 198        |
| 22                      | 24           | 5155       | 8      | 1025       | 53         | 9298       | 5      | 248        |
| 23                      | 22           | 5385       | 8      | 1666       | 37         | 9615       | 1      | 637        |
| 24                      | 23           | 5656       | 6      | 1769       | 33         | 9503       | 0      | 605        |
| 25                      | 21           | 5339       | 7      | 1879       | 27         | 9610       | 1      | 504        |
| 26                      | 14           | 5047       | 7      | 1747       | 21         | 9078       | 1      | 410        |

NOTE: Numbers in table correspond to Kaplan-Meier curves shown in Figure 3 which were truncated at 26 weeks to avoid incomplete follow-up and sparse data. Therefore, the total number of observations in the table does not represent the total nested sample given in Materials and Methods.

Supplementary Table 3H: Vital Status by Vaccination Status, RT-PCR Assay, and Week from RT-PCR Assay, Beginning February 1, 2021 (used for Figure 3D): Charlson Comorbidity Index score  $\geq 3$

| Weeks from RT-PCR Assay | Unvaccinated |            |        |            | Vaccinated |            |        |            |
|-------------------------|--------------|------------|--------|------------|------------|------------|--------|------------|
|                         | PCR-         |            | PCR +  |            | PCR-       |            | PCR +  |            |
|                         | Deaths       | Non-Deaths | Deaths | Non-Deaths | Deaths     | Non-Deaths | Deaths | Non-Deaths |
| 1                       | 247          | 593        | 213    | 316        | 319        | 2456       | 82     | 679        |
| 2                       | 480          | 377        | 432    | 312        | 704        | 1719       | 171    | 586        |
| 3                       | 408          | 434        | 381    | 382        | 691        | 1840       | 139    | 699        |
| 4                       | 356          | 361        | 233    | 404        | 612        | 1617       | 93     | 709        |
| 5                       | 319          | 374        | 137    | 496        | 557        | 1732       | 72     | 822        |
| 6                       | 255          | 437        | 87     | 459        | 493        | 1888       | 50     | 936        |
| 7                       | 202          | 630        | 59     | 494        | 432        | 2956       | 26     | 847        |
| 8                       | 190          | 1284       | 47     | 477        | 387        | 6269       | 19     | 785        |
| 9                       | 164          | 1232       | 43     | 354        | 349        | 6142       | 18     | 631        |
| 10                      | 134          | 1154       | 30     | 260        | 293        | 5852       | 9      | 420        |
| 11                      | 119          | 1156       | 26     | 181        | 263        | 5682       | 8      | 291        |
| 12                      | 107          | 1103       | 37     | 132        | 257        | 5473       | 17     | 230        |
| 13                      | 94           | 916        | 22     | 86         | 193        | 4647       | 17     | 138        |
| 14                      | 77           | 987        | 18     | 99         | 160        | 4570       | 8      | 105        |
| 15                      | 63           | 979        | 21     | 82         | 164        | 4936       | 11     | 103        |
| 16                      | 43           | 993        | 22     | 91         | 143        | 4767       | 6      | 106        |
| 17                      | 42           | 1003       | 20     | 103        | 129        | 4974       | 7      | 92         |
| 18                      | 35           | 867        | 20     | 96         | 93         | 4322       | 9      | 117        |
| 19                      | 30           | 841        | 15     | 112        | 93         | 4397       | 10     | 105        |
| 20                      | 38           | 957        | 14     | 137        | 87         | 4672       | 10     | 138        |
| 21                      | 32           | 874        | 12     | 160        | 76         | 4677       | 6      | 154        |
| 22                      | 38           | 878        | 11     | 155        | 72         | 4618       | 5      | 150        |
| 23                      | 31           | 954        | 10     | 261        | 69         | 4796       | 6      | 459        |
| 24                      | 17           | 950        | 11     | 300        | 47         | 4757       | 3      | 403        |
| 25                      | 19           | 958        | 7      | 314        | 60         | 4504       | 1      | 388        |
| 26                      | 10           | 845        | 11     | 288        | 42         | 4403       | 4      | 329        |

NOTE: Numbers in table correspond to Kaplan-Meier curves shown in Figure 3 which were truncated at 26 weeks to avoid incomplete follow-up and sparse data. Therefore, the total number of observations in the table does not represent the total nested sample given in Materials and Methods.

Supplementary Table 3I: Vital Status by Vaccination Status, RT-PCR Assay, and Week from RT-PCR Assay, Beginning July 1, 2021 (used for Figure S1A): Age <65 years

| Weeks from RT-PCR Assay | Unvaccinated |            |        |            | Vaccinated |            |        |            |
|-------------------------|--------------|------------|--------|------------|------------|------------|--------|------------|
|                         | PCR-         |            | PCR +  |            | PCR-       |            | PCR +  |            |
|                         | Deaths       | Non-Deaths | Deaths | Non-Deaths | Deaths     | Non-Deaths | Deaths | Non-Deaths |
| 1                       | 30           | 3932       | 35     | 1811       | 19         | 3747       | 10     | 677        |
| 2                       | 33           | 3002       | 127    | 1731       | 42         | 2839       | 11     | 673        |
| 3                       | 17           | 3285       | 104    | 2217       | 32         | 3068       | 7      | 853        |
| 4                       | 27           | 2923       | 85     | 2497       | 34         | 2729       | 6      | 861        |
| 5                       | 19           | 3297       | 44     | 3203       | 24         | 2990       | 13     | 1101       |
| 6                       | 19           | 3622       | 24     | 3329       | 33         | 3315       | 1      | 1129       |
| 7                       | 16           | 4648       | 9      | 3380       | 17         | 4457       | 5      | 1082       |
| 8                       | 12           | 8459       | 5      | 3397       | 22         | 8480       | 2      | 1048       |

NOTE: Numbers in table correspond to Kaplan-Meier curves shown in Supplementary Figure 1 which included RT-PCR results beginning July 1, 2021 onward to examine the time period corresponding to the dominance of the Delta variant. Owing to the shorter follow-up period these curves were truncated at 8 weeks to avoid incomplete follow-up and sparse data.



Supplementary Table 3J: Vital Status by Vaccination Status, RT-PCR Assay, and Week from RT-PCR Assay, Beginning July 1, 2021 (used for Figure S1B): Age  $\geq 65$  years

|                         | Unvaccinated |            |        |            | Vaccinated |            |        |            |
|-------------------------|--------------|------------|--------|------------|------------|------------|--------|------------|
|                         | PCR-         |            | PCR +  |            | PCR-       |            | PCR +  |            |
| Weeks from RT-PCR Assay | Deaths       | Non-Deaths | Deaths | Non-Deaths | Deaths     | Non-Deaths | Deaths | Non-Deaths |
| 1                       | 79           | 1542       | 131    | 708        | 178        | 5760       | 64     | 1241       |
| 2                       | 133          | 1100       | 345    | 661        | 383        | 4267       | 185    | 1046       |
| 3                       | 86           | 1102       | 323    | 821        | 333        | 4360       | 149    | 1300       |
| 4                       | 105          | 953        | 177    | 852        | 255        | 3870       | 92     | 1210       |
| 5                       | 75           | 1038       | 83     | 1059       | 230        | 4114       | 51     | 1508       |
| 6                       | 55           | 1190       | 38     | 1032       | 182        | 4368       | 27     | 1648       |
| 7                       | 58           | 1405       | 25     | 1011       | 158        | 5961       | 15     | 1488       |
| 8                       | 40           | 2367       | 8      | 872        | 119        | 10820      | 10     | 1330       |

NOTE: Numbers in table correspond to Kaplan-Meier curves shown in Supplementary Figure 1 which included RT-PCR results beginning July 1, 2021 onward to examine the time period corresponding to the dominance of the Delta variant. Owing to the shorter follow-up period these curves were truncated at 8 weeks to avoid incomplete follow-up and sparse data.

**Supplementary Figure 1.** Kaplan-Meier curves illustrating cumulative risk of death due to any cause by vaccination status and RT-PCR assay for the period beginning July 1, 2021, corresponding to the emergence and dominance of the Delta variant in the U.S.: A) age <65 years; B) age  $\geq 65$  years

**A. Age <65 years**

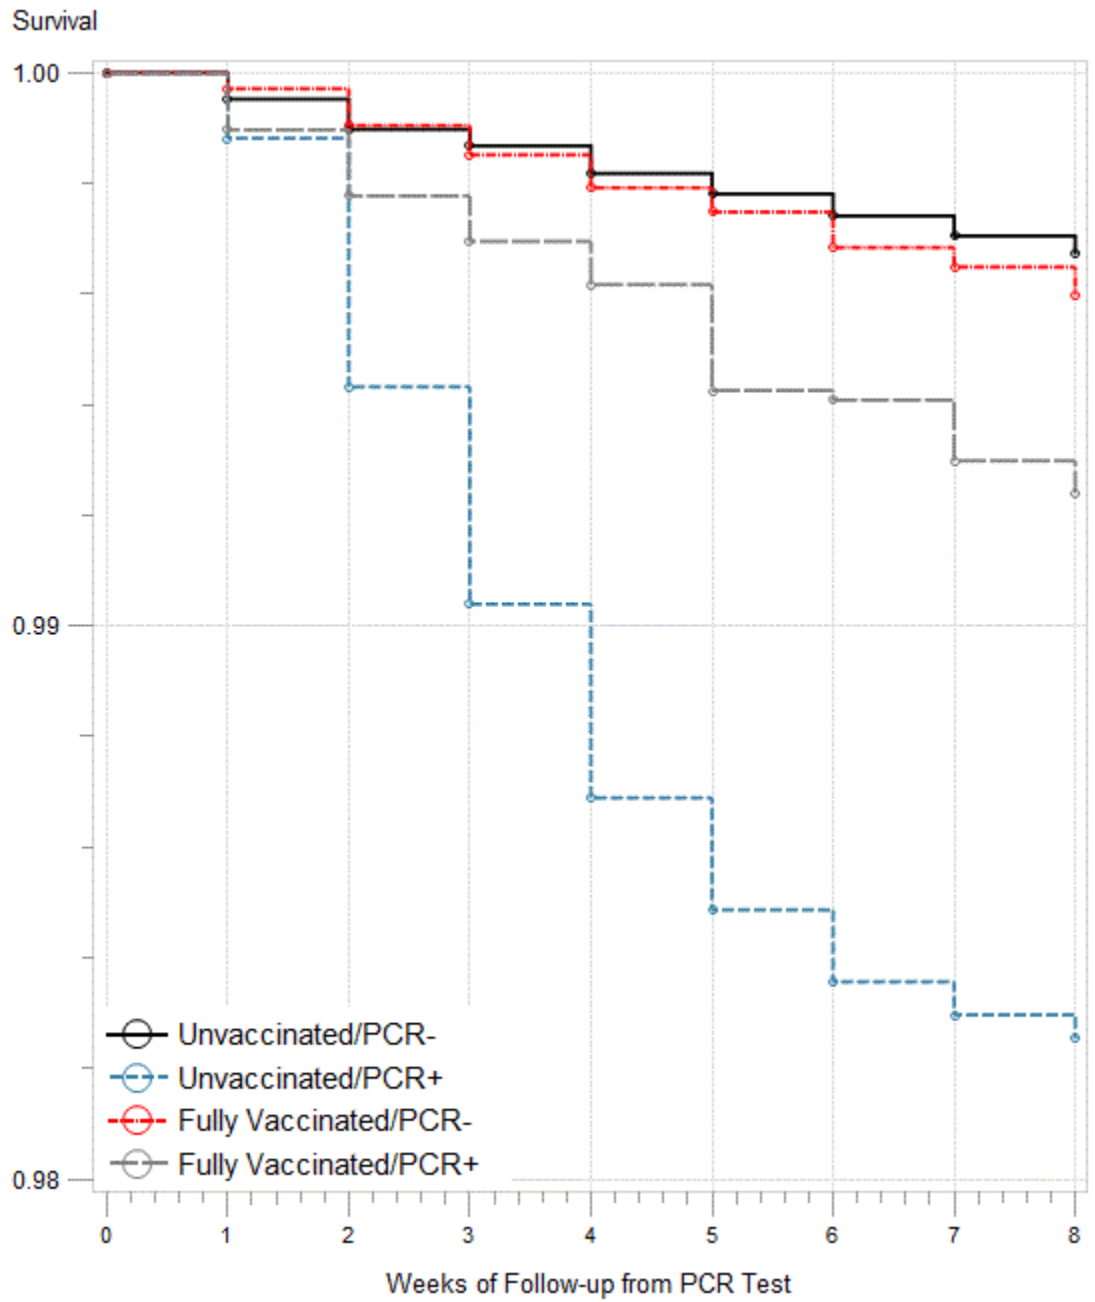

## B. Age $\geq 65$ years

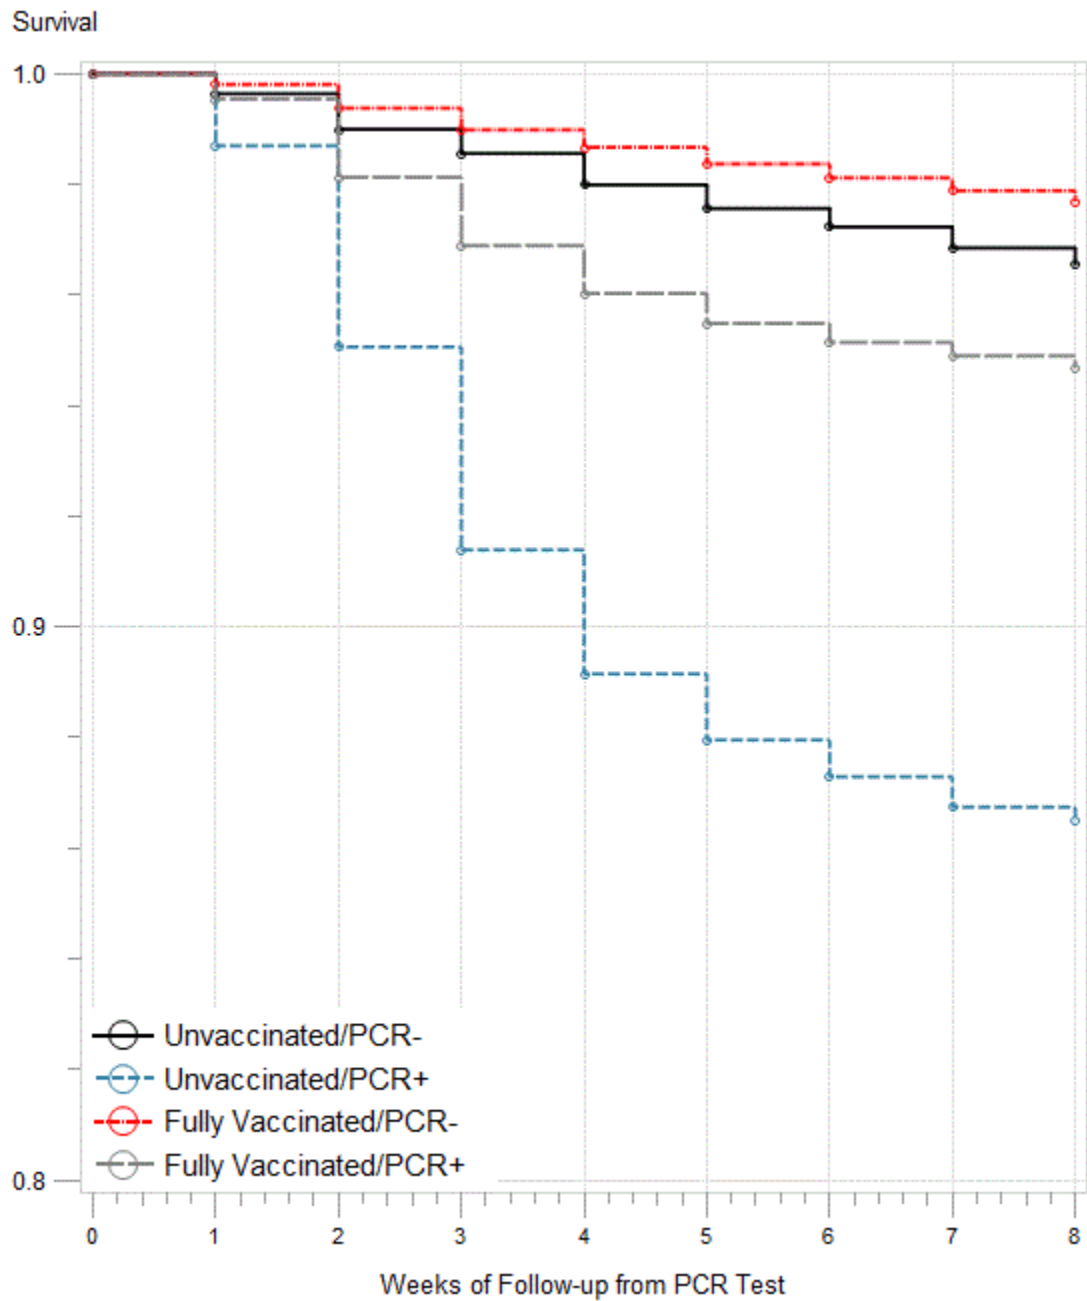

## References and Notes

1. T. Pilishvili, K. E. Fleming-Dutra, J. L. Farrar, R. Gierke, N. M. Mohr, D. A. Talan, A. Krishnadasan, K. K. Harland, H. A. Smithline, P. C. Hou, L. C. Lee, S. C. Lim, G. J. Moran, E. Krebs, M. Steele, D. G. Beiser, B. Faine, J. P. Haran, U. Nandi, W. A. Schrading, B. Chinnock, D. J. Henning, F. LoVecchio, J. Nadle, D. Barter, M. Brackney, A. Britton, K. Marceaux-Galli, S. Lim, E. C. Phipps, G. Dumyati, R. Pierce, T. M. Markus, D. J. Anderson, A. K. Debes, M. Lin, J. Mayer, H. M. Babcock, N. Safdar, M. Fischer, R. Singleton, N. Chea, S. S. Magill, J. Verani, S. Schrag, A. Yousaf, Y. Chung, J. Onukwube, W. Xing, B. Clinansmith, L. Uribe, K. E. Poronsky, D. M. Hashimoto, M. Bahamon, M. St. Romain, E. Kean, A. Stubbs, S. Roy, G. Volturo, J. Galbraith, J. C. Crosby, M. R. Fuentes, M. Mulrow, J. Lee, H. Johnston, A. J. Hansen, S. K. Fridkin, L. E. Wilson, S. Lovett, M. Christian, C. Myers, V. L. S. Ocampo, K. Talbot, J. Seidelman, A. M. Milstone, M. Hayden, M. Samore, J. H. Kwon, D. Shirley, D. Dillard, J. Dobson; Vaccine Effectiveness Among Healthcare Personnel Study Team, Interim Estimates of Vaccine Effectiveness of Pfizer-BioNTech and Moderna COVID-19 Vaccines Among Health Care Personnel - 33 U.S. Sites, January-March 2021. *MMWR Morb. Mortal. Wkly. Rep.* **70**, 753–758 (2021). [doi:10.15585/mmwr.mm7020e2](https://doi.org/10.15585/mmwr.mm7020e2) [Medline](#)
2. A. Christie, S. J. Henley, L. Mattocks, R. Fernando, A. Lansky, F. B. Ahmad, J. Adjemian, R. N. Anderson, A. M. Binder, K. Carey, D. L. Dee, T. Dias, W. M. Duck, D. M. Gaughan, B. C. Lyons, A. D. McNaghten, M. M. Park, H. Reses, L. Rodgers, K. Van Santen, D. Walker, M. J. Beach, Decreases in COVID-19 Cases, Emergency Department Visits, Hospital Admissions, and Deaths Among Older Adults Following the Introduction of COVID-19 Vaccine - United States, September 6, 2020-May 1, 2021. *MMWR Morb. Mortal. Wkly. Rep.* **70**, 858–864 (2021). [doi:10.15585/mmwr.mm7023e2](https://doi.org/10.15585/mmwr.mm7023e2) [Medline](#)
3. M. G. Thompson, J. L. Burgess, A. L. Naleway, H. L. Tyner, S. K. Yoon, J. Meece, L. E. W. Olsho, A. J. Caban-Martinez, A. Fowlkes, K. Lutrick, J. L. Kuntz, K. Dunnigan, M. J. Odean, K. T. Hegmann, E. Stefanski, L. J. Edwards, N. Schaefer-Solle, L. Grant, K. Ellingson, H. C. Groom, T. Zunie, M. S. Thiese, L. Ivacic, M. G. Wesley, J. M. Lamberte, X. Sun, M. E. Smith, A. L. Phillips, K. D. Groover, Y. M. Yoo, J. Gerald, R. T. Brown, M. K. Herring, G. Joseph, S. Beitel, T. C. Morrill, J. Mak, P. Rivers, K. M. Harris, D. R. Hunt, M. L. Arvay, P. Kutty, A. M. Fry, M. Gaglani, Interim Estimates of Vaccine Effectiveness of BNT162b2 and mRNA-1273 COVID-19 Vaccines in Preventing SARS-CoV-2 Infection Among Health Care Personnel, First Responders, and Other Essential and Frontline Workers - Eight U.S. Locations, December 2020-March 2021. *MMWR Morb. Mortal. Wkly. Rep.* **70**, 495–500 (2021). [doi:10.15585/mmwr.mm7013e3](https://doi.org/10.15585/mmwr.mm7013e3) [Medline](#)
4. C. M. Brown, J. Vostok, H. Johnson, M. Burns, R. Gharpure, S. Sami, R. T. Sabo, N. Hall, A. Foreman, P. L. Schubert, G. R. Gallagher, T. Fink, L. C. Madoff, S. B. Gabriel, B. MacInnis, D. J. Park, K. J. Siddle, V. Harik, D. Arvidson, T. Brock-Fisher, M. Dunn, A. Kearns, A. S. Laney, Outbreak of SARS-CoV-2 Infections, Including COVID-19 Vaccine Breakthrough Infections, Associated with Large Public Gatherings - Barnstable County, Massachusetts, July 2021. *MMWR Morb. Mortal. Wkly. Rep.* **70**, 1059–1062 (2021). [doi:10.15585/mmwr.mm7031e2](https://doi.org/10.15585/mmwr.mm7031e2) [Medline](#)

5. R. Herlihy, W. Bamberg, A. Burakoff, N. Alden, R. Severson, E. Bush, B. Kawasaki, B. Berger, E. Austin, M. Shea, E. Gabrieloff, S. Matzinger, A. Burdorf, J. Nichols, K. Goode, A. Cilwick, C. Stacy, E. Staples, G. Stringer, Rapid Increase in Circulation of the SARS-CoV-2 B.1.617.2 (Delta) Variant - Mesa County, Colorado, April-June 2021. *MMWR Morb. Mortal. Wkly. Rep.* **70**, 1084–1087 (2021). [doi:10.15585/mmwr.mm7032e2](https://doi.org/10.15585/mmwr.mm7032e2) [Medline](#)
6. S. J. Thomas, E. D. Moreira Jr., N. Kitchin, J. Absalon, A. Gurtman, S. Lockhart, J. L. Perez, G. Pérez Marc, F. P. Polack, C. Zerbini, R. Bailey, K. A. Swanson, X. Xu, S. Roychoudhury, K. Koury, S. Bouguermouh, W. V. Kalina, D. Cooper, R. W. Frenck Jr., L. L. Hammitt, Ö. Türeci, H. Nell, A. Schaefer, S. Ünal, Q. Yang, P. Liberator, D. B. Tresnan, S. Mather, P. R. Dormitzer, U. Şahin, W. C. Gruber, K. U. Jansen; C4591001 Clinical Trial Group, Safety and Efficacy of the BNT162b2 mRNA Covid-19 Vaccine through 6 Months. *N. Engl. J. Med.* 10.1056/NEJMoa2110345 (2021). [doi:10.1056/NEJMoa2110345](https://doi.org/10.1056/NEJMoa2110345) [Medline](#)
7. N. Doria-Rose, M. S. Suthar, M. Makowski, S. O’Connell, A. B. McDermott, B. Flach, J. E. Ledgerwood, J. R. Mascola, B. S. Graham, B. C. Lin, S. O’Dell, S. D. Schmidt, A. T. Widge, V.-V. Edara, E. J. Anderson, L. Lai, K. Floyd, N. G. Rouphael, V. Zarnitsyna, P. C. Roberts, M. Makhene, W. Buchanan, C. J. Luke, J. H. Beigel, L. A. Jackson, K. M. Neuzil, H. Bennett, B. Leav, J. Albert, P. Kunwar; mRNA-1273 Study Group, Antibody Persistence through 6 Months after the Second Dose of mRNA-1273 Vaccine for Covid-19. *N. Engl. J. Med.* **384**, 2259–2261 (2021). [doi:10.1056/NEJMc2103916](https://doi.org/10.1056/NEJMc2103916) [Medline](#)
8. H. M. El Sahly, L. R. Baden, B. Essink, S. Doblecki-Lewis, J. M. Martin, E. J. Anderson, T. B. Campbell, J. Clark, L. A. Jackson, C. J. Fichtenbaum, M. Zervos, B. Rankin, F. Eder, G. Feldman, C. Kennelly, L. Han-Conrad, M. Levin, K. M. Neuzil, L. Corey, P. Gilbert, H. Janes, D. Follmann, M. Marovich, L. Polakowski, J. R. Mascola, J. E. Ledgerwood, B. S. Graham, A. August, H. Clouting, W. Deng, S. Han, B. Leav, D. Manzo, R. Pajon, F. Schödel, J. E. Tomassini, H. Zhou, J. Miller; COVE Study Group, Efficacy of the mRNA-1273 SARS-CoV-2 Vaccine at Completion of Blinded Phase. *N. Engl. J. Med.* 10.1056/NEJMoa2113017 (2021). [doi:10.1056/NEJMoa2113017](https://doi.org/10.1056/NEJMoa2113017) [Medline](#)
9. J. M. Polinski *et al.*, Effectiveness of the Single-Dose Ad26.COV2.S COVID Vaccine. *medRxiv*, 2021.2009.2010.21263385 (2021). [doi:10.1101/2021.09.10.21263385](https://doi.org/10.1101/2021.09.10.21263385)
10. E. S. Rosenberg, D. R. Holtgrave, V. Dorabawila, M. Conroy, D. Greene, E. Lutterloh, B. Backenson, D. Hofer, J. Morne, U. Bauer, H. A. Zucker, New COVID-19 Cases and Hospitalizations Among Adults, by Vaccination Status - New York, May 3-July 25, 2021. *MMWR Morb. Mortal. Wkly. Rep.* **70**, 1306–1311 (2021). [doi:10.15585/mmwr.mm7037a7](https://doi.org/10.15585/mmwr.mm7037a7) [Medline](#)
11. S. Nanduri, T. Pilishvili, G. Derado, M. M. Soe, P. Dollard, H. Wu, Q. Li, S. Bagchi, H. Dubendris, R. Link-Gelles, J. A. Jernigan, D. Budnitz, J. Bell, A. Benin, N. Shang, J. R. Edwards, J. R. Verani, S. J. Schrag, Effectiveness of Pfizer-BioNTech and Moderna Vaccines in Preventing SARS-CoV-2 Infection Among Nursing Home Residents Before and During Widespread Circulation of the SARS-CoV-2 B.1.617.2 (Delta) Variant - National Healthcare Safety Network, March 1-August 1, 2021. *MMWR Morb. Mortal. Wkly. Rep.* **70**, 1163–1166 (2021). [doi:10.15585/mmwr.mm7034e3](https://doi.org/10.15585/mmwr.mm7034e3) [Medline](#)

12. A. Fowlkes, M. Gaglani, K. Groover, M. S. Thiese, H. Tyner, K. Ellingson; HEROES-RECOVER Cohorts, Effectiveness of COVID-19 Vaccines in Preventing SARS-CoV-2 Infection Among Frontline Workers Before and During B.1.617.2 (Delta) Variant Predominance - Eight U.S. Locations, December 2020-August 2021. *MMWR Morb. Mortal. Wkly. Rep.* **70**, 1167–1169 (2021). [doi:10.15585/mmwr.mm7034e4](https://doi.org/10.15585/mmwr.mm7034e4) [Medline](#)
13. M. W. Tenforde, W. H. Self, E. A. Naioti, A. A. Ginde, D. J. Douin, S. M. Olson, H. K. Talbot, J. D. Casey, N. M. Mohr, A. Zepeski, M. Gaglani, T. McNeal, S. Ghamande, N. I. Shapiro, K. W. Gibbs, D. C. Files, D. N. Hager, A. Shehu, M. E. Prekker, H. L. Erickson, M. N. Gong, A. Mohamed, D. J. Henning, J. S. Steingrub, I. D. Peltan, S. M. Brown, E. T. Martin, A. S. Monto, A. Khan, C. L. Hough, L. W. Busse, C. C. Ten Lohuis, A. Duggal, J. G. Wilson, A. J. Gordon, N. Qadir, S. Y. Chang, C. Mallow, C. Rivas, H. M. Babcock, J. H. Kwon, M. C. Exline, N. Halasa, J. D. Chappell, A. S. Luring, C. G. Grijalva, T. W. Rice, I. D. Jones, W. B. Stubblefield, A. Baughman, K. N. Womack, C. J. Lindsell, K. W. Hart, Y. Zhu, M. Stephenson, S. J. Schrag, M. Kobayashi, J. R. Verani, M. M. Patel, N. Calhoun, K. Murthy, J. Herrick, A. McKillop, E. Hoffman, M. Zayed, M. Smith, N. Settele, J. Ettlinger, E. Priest, J. Thomas, A. Arroliga, M. Beeram, R. Kindle, L.-A. Kozikowski, L. De Souza, S. Ouellette, S. Thornton-Thompson, P. Tyler, O. Mehkri, K. Ashok, S. Gole, A. King, B. Poynter, N. Stanley, A. Hendrickson, E. Maruggi, T. Scharber, J. Jorgensen, R. Bowers, J. King, V. Aston, B. Armbruster, R. E. Rothman, R. Nair, J.-T. T. Chen, S. Karow, E. Robart, P. N. Maldonado, M. Khan, P. So, J. Levitt, C. Perez, A. Visweswaran, J. Roque, A. Rivera, T. Frankel, M. Howell, J. Friedel, J. Goff, D. Huynh, M. Tozier, C. Driver, M. Carricato, A. Foster, P. Nassar, L. Stout, Z. Sibenaller, A. Walter, J. Mares, L. Olson, B. Clinansmith, C. Rivas, H. Gershengorn, E. J. McSpadden, R. Truscon, A. Kaniclides, L. Thomas, R. Bielak, W. D. Valvano, R. Fong, W. J. Fitzsimmons, C. Blair, A. L. Valesano, J. Gilbert, C. D. Crider, K. A. Steinbock, T. C. Paulson, L. A. Anderson, C. Kampe, J. Johnson, R. McHenry, M. Blair, D. Conway, M. LaRose, L. Landreth, M. Hicks, L. Parks, J. Bongu, D. McDonald, C. Cass, S. Seiler, D. Park, T. Hink, M. Wallace, C.-A. Burnham, O. G. Arter; IVY Network Investigators; IVY Network, Sustained Effectiveness of Pfizer-BioNTech and Moderna Vaccines Against COVID-19 Associated Hospitalizations Among Adults - United States, March-July 2021. *MMWR Morb. Mortal. Wkly. Rep.* **70**, 1156–1162 (2021). [doi:10.15585/mmwr.mm7034e2](https://doi.org/10.15585/mmwr.mm7034e2) [Medline](#)
14. H. M. Scobie, A. G. Johnson, A. B. Suthar, R. Severson, N. B. Alden, S. Balter, D. Bertolino, D. Blythe, S. Brady, B. Cadwell, I. Cheng, S. Davidson, J. Delgadillo, K. Devinney, J. Duchin, M. Duwell, R. Fisher, A. Fleischauer, A. Grant, J. Griffin, M. Haddix, J. Hand, M. Hanson, E. Hawkins, R. K. Herlihy, L. Hicks, C. Holtzman, M. Hoskins, J. Hyun, R. Kaur, M. Kay, H. Kidrowski, C. Kim, K. Komatsu, K. Kugeler, M. Lewis, B. C. Lyons, S. Lyons, R. Lynfield, K. McCaffrey, C. McMullen, L. Milroy, S. Meyer, L. Nolen, M. R. Patel, S. Pogojans, H. E. Reese, A. Saupe, J. Sell, T. Sokol, D. Sosin, E. Stanislawski, K. Stevens, H. Vest, K. White, E. Wilson, A. MacNeil, M. D. Ritchey, B. J. Silk, Monitoring Incidence of COVID-19 Cases, Hospitalizations, and Deaths, by Vaccination Status - 13 U.S. Jurisdictions, April 4-July 17, 2021. *MMWR Morb. Mortal. Wkly. Rep.* **70**, 1284–1290 (2021). [doi:10.15585/mmwr.mm7037e1](https://doi.org/10.15585/mmwr.mm7037e1) [Medline](#)
15. W. H. Self, M. W. Tenforde, J. P. Rhoads, M. Gaglani, A. A. Ginde, D. J. Douin, S. M. Olson, H. K. Talbot, J. D. Casey, N. M. Mohr, A. Zepeski, T. McNeal, S. Ghamande, K.

- W. Gibbs, D. C. Files, D. N. Hager, A. Shehu, M. E. Prekker, H. L. Erickson, M. N. Gong, A. Mohamed, D. J. Henning, J. S. Steingrub, I. D. Peltan, S. M. Brown, E. T. Martin, A. S. Monto, A. Khan, C. L. Hough, L. W. Busse, C. C. Ten Lohuis, A. Duggal, J. G. Wilson, A. J. Gordon, N. Qadir, S. Y. Chang, C. Mallow, C. Rivas, H. M. Babcock, J. H. Kwon, M. C. Exline, N. Halasa, J. D. Chappell, A. S. Luring, C. G. Grijalva, T. W. Rice, I. D. Jones, W. B. Stubblefield, A. Baughman, K. N. Womack, C. J. Lindsell, K. W. Hart, Y. Zhu, L. Mills, S. N. Lester, M. M. Stumpf, E. A. Naioti, M. Kobayashi, J. R. Verani, N. J. Thornburg, M. M. Patel, N. Calhoun, K. Murthy, J. Herrick, A. McKillop, E. Hoffman, M. Zayed, M. Smith, N. Seattle, J. Ettliger, E. Priest, J. Thomas, A. Arroliga, M. Beeram, R. Kindle, L.-A. Kozikowski, L. De Souza, S. Ouellette, S. Thornton-Thompson, O. Mehkri, K. Ashok, S. Gole, A. King, B. Poynter, N. Stanley, A. Hendrickson, E. Maruggi, T. Scharber, J. Jorgensen, R. Bowers, J. King, V. Aston, B. Armbruster, R. E. Rothman, R. Nair, J.-T. T. Chen, S. Karow, E. Robart, P. N. Maldonado, M. Khan, P. So, J. Levitt, C. Perez, A. Visweswaran, J. Roque, A. Rivera, L. Angeles, T. Frankel, L. Angeles, J. Goff, D. Huynh, M. Howell, J. Friedel, M. Tozier, C. Driver, M. Carricato, A. Foster, P. Nassar, L. Stout, Z. Sibenaller, A. Walter, J. Mares, L. Olson, B. Clinansmith, C. Rivas, H. Gershengorn, E. J. McSpadden, R. Truscon, A. Kaniclides, L. Thomas, R. Bielak, W. D. Valvano, R. Fong, W. J. Fitzsimmons, C. Blair, A. L. Valesano, J. Gilbert, C. D. Crider, K. A. Steinbock, T. C. Paulson, L. A. Anderson, C. Kampe, J. Johnson, R. McHenry, M. Blair, D. Conway, M. LaRose, L. Landreth, M. Hicks, L. Parks, J. Bongu, D. McDonald, C. Cass, S. Seiler, D. Park, T. Hink, M. Wallace, C.-A. Burnham, O. G. Arter; IVY Network, Comparative Effectiveness of Moderna, Pfizer-BioNTech, and Janssen (Johnson & Johnson) Vaccines in Preventing COVID-19 Hospitalizations Among Adults Without Immunocompromising Conditions - United States, March-August 2021. *MMWR Morb. Mortal. Wkly. Rep.* **70**, 1337–1343 (2021). [doi:10.15585/mmwr.mm7038e1](https://doi.org/10.15585/mmwr.mm7038e1) [Medline](#)
16. Y. Goldberg *et al.*, Waning immunity of the BNT162b2 vaccine: A nationwide study from Israel. *medRxiv*, (2021). doi:10.1101/2021.08.24.21262423.
17. N. Dagan, N. Barda, E. Kepten, O. Miron, S. Perchik, M. A. Katz, M. A. Hernán, M. Lipsitch, B. Reis, R. D. Balicer, BNT162b2 mRNA Covid-19 Vaccine in a Nationwide Mass Vaccination Setting. *N. Engl. J. Med.* **384**, 1412–1423 (2021). [doi:10.1056/NEJMoa2101765](https://doi.org/10.1056/NEJMoa2101765) [Medline](#)
18. “Israel expands COVID vaccine booster campaign to over 50s, health workers., *Reuters*, 13 August 2021.
19. Y. M. Bar-On, Y. Goldberg, M. Mandel, O. Bodenheimer, L. Freedman, N. Kalkstein, B. Mizrahi, S. Alroy-Preis, N. Ash, R. Milo, A. Huppert, Protection of BNT162b2 Vaccine Booster against Covid-19 in Israel. *N. Engl. J. Med.* **385**, 1393–1400 (2021). [doi:10.1056/NEJMoa2114255](https://doi.org/10.1056/NEJMoa2114255) [Medline](#)
20. J. Lopez Bernal, N. Andrews, C. Gower, E. Gallagher, R. Simmons, S. Thelwall, J. Stowe, E. Tessier, N. Groves, G. Dabrera, R. Myers, C. N. J. Campbell, G. Amirhalingam, M. Edmunds, M. Zambon, K. E. Brown, S. Hopkins, M. Chand, M. Ramsay, Effectiveness of Covid-19 Vaccines against the B.1.617.2 (Delta) Variant. *N. Engl. J. Med.* **385**, 585–594 (2021). [doi:10.1056/NEJMoa2108891](https://doi.org/10.1056/NEJMoa2108891) [Medline](#)

21. K. B. Pouwels *et al.*, Impact of Delta on viral burden and vaccine effectiveness against new SARS-CoV-2 infections in the UK. *medRxiv*, 2021.2008.2018.21262237 (2021). doi:10.1101/2021.08.18.21262237.
22. FDA, “FDA Authorizes Booster Dose of Pfizer-BioNTech COVID-19 Vaccine for Certain Populations” (www.fda.gov/news-events/press-announcements/fda-authorizes-booster-dose-pfizer-biontech-covid-19-vaccine-certain-populations).
23. FDA, “Coronavirus (COVID-19) Update: FDA Takes Additional Actions on the Use of a Booster Dose for COVID-19 Vaccines” (www.fda.gov/news-events/press-announcements/coronavirus-covid-19-update-fda-takes-additional-actions-use-booster-dose-covid-19-vaccines).
24. P. R. Krause, T. R. Fleming, R. Peto, I. M. Longini, J. P. Figueroa, J. A. C. Sterne, A. Cravioto, H. Rees, J. P. T. Higgins, I. Boutron, H. Pan, M. F. Gruber, N. Arora, F. Kazi, R. Gaspar, S. Swaminathan, M. J. Ryan, A.-M. Henao-Restrepo, Considerations in boosting COVID-19 vaccine immune responses. *Lancet* **398**, 1377–1380 (2021). doi:10.1016/S0140-6736(21)02046-8 [Medline](#)
25. CDC COVID-19 Vaccine Breakthrough Case Investigations Team, COVID-19 Vaccine Breakthrough Infections Reported to CDC - United States, January 1-April 30, 2021. *MMWR Morb. Mortal. Wkly. Rep.* **70**, 792–793 (2021). [Medline](#)
26. N. Brusselaers, J. Lagergren, The Charlson Comorbidity Index in Registry-based Research. *Methods Inf. Med.* **56**, 401–406 (2017). doi:10.3414/ME17-01-0051 [Medline](#)
27. Y. Young-Xu, C. Korves, J. Roberts, E. I. Powell, G. M. Zwain, J. Smith, H. S. Izurieta, Coverage and Estimated Effectiveness of mRNA COVID-19 Vaccines Among US Veterans. *JAMA Netw. Open* **4**, e2128391 (2021). doi:10.1001/jamanetworkopen.2021.28391 [Medline](#)
28. Y. Wang, R. Chen, F. Hu, Y. Lan, Z. Yang, C. Zhan, J. Shi, X. Deng, M. Jiang, S. Zhong, B. Liao, K. Deng, J. Tang, L. Guo, M. Jiang, Q. Fan, M. Li, J. Liu, Y. Shi, X. Deng, X. Xiao, M. Kang, Y. Li, W. Guan, Y. Li, S. Li, F. Li, N. Zhong, X. Tang, Transmission, viral kinetics and clinical characteristics of the emergent SARS-CoV-2 Delta VOC in Guangzhou, China. *EClinicalMedicine* **40**, 101129 (2021). doi:10.1016/j.eclinm.2021.101129 [Medline](#)
29. K. Bruxvoort *et al.*, Effectiveness of mRNA-1273 against Delta, Mu, and other emerging variants. *medRxiv*, (2021). doi:10.1101/2021.09.29.21264199.
30. A. Puranik *et al.*, Comparison of two highly-effective mRNA vaccines for COVID-19 during periods of Alpha and Delta variant prevalence. *medRxiv*, (2021). doi:10.1101/2021.08.06.21261707.
31. S. Y. Tartof, J. M. Slezak, H. Fischer, V. Hong, B. K. Ackerson, O. N. Ranasinghe, T. B. Frankland, O. A. Ogun, J. M. Zamparo, S. Gray, S. R. Valluri, K. Pan, F. J. Angulo, L. Jodar, J. M. McLaughlin, Effectiveness of mRNA BNT162b2 COVID-19 vaccine up to 6 months in a large integrated health system in the USA: A retrospective cohort study. *Lancet* **398**, 1407–1416 (2021). doi:10.1016/S0140-6736(21)02183-8 [Medline](#)
32. H. Chemaitelly, P. Tang, M. R. Hasan, S. AlMukdad, H. M. Yassine, F. M. Benslimane, H. A. Al Khatib, P. Coyle, H. H. Ayoub, Z. Al Kanaani, E. Al Kuwari, A. Jeremijenko, A.



- H. Kaleeckal, A. N. Latif, R. M. Shaik, H. F. Abdul Rahim, G. K. Nasrallah, M. G. Al Kuwari, H. E. Al Romaihi, A. A. Butt, M. H. Al-Thani, A. Al Khal, R. Bertollini, L. J. Abu-Raddad, Waning of BNT162b2 Vaccine Protection against SARS-CoV-2 Infection in Qatar. *N. Engl. J. Med.* 10.1056/NEJMoa2114114 (2021). [doi:10.1056/NEJMoa2114114](https://doi.org/10.1056/NEJMoa2114114) [Medline](#)
33. H. Chemaitelly, H. M. Yassine, F. M. Benslimane, H. A. Al Khatib, P. Tang, M. R. Hasan, J. A. Malek, P. Coyle, H. H. Ayoub, Z. Al Kanaani, E. Al Kuwari, A. Jeremijenko, A. H. Kaleeckal, A. N. Latif, R. M. Shaik, H. F. Abdul Rahim, G. K. Nasrallah, M. G. Al Kuwari, H. E. Al Romaihi, M. H. Al-Thani, A. Al Khal, A. A. Butt, R. Bertollini, L. J. Abu-Raddad, mRNA-1273 COVID-19 vaccine effectiveness against the B.1.1.7 and B.1.351 variants and severe COVID-19 disease in Qatar. *Nat. Med.* **27**, 1614–1621 (2021). [doi:10.1038/s41591-021-01446-y](https://doi.org/10.1038/s41591-021-01446-y) [Medline](#)
34. T. Tada *et al.*, Comparison of Neutralizing Antibody Titers Elicited by mRNA and Adenoviral Vector Vaccine against SARS-CoV-2 Variants. *bioRxiv*, 2021.2007.2019.452771 (2021). [doi:10.1101/2021.07.19.452771](https://doi.org/10.1101/2021.07.19.452771).
35. R. R. Goel, M. M. Painter, S. A. Apostolidis, D. Mathew, W. Meng, A. M. Rosenfeld, K. A. Lundgreen, A. Reynaldi, D. S. Khoury, A. Pattekar, S. Gouma, L. Kuri-Cervantes, P. Hicks, S. Dysinger, A. Hicks, H. Sharma, S. Herring, S. Korte, A. E. Baxter, D. A. Oldridge, J. R. Giles, M. E. Weirick, C. M. McAllister, M. Awofolaju, N. Tanenbaum, E. M. Drapeau, J. Dougherty, S. Long, K. D'Andrea, J. T. Hamilton, M. McLaughlin, J. C. Williams, S. Adamski, O. Kuthuru, I. Frank, M. R. Betts, L. A. Vella, A. Grifoni, D. Weiskopf, A. Sette, S. E. Hensley, M. P. Davenport, P. Bates, E. T. Luning Prak, A. R. Greenplate, E. J. Wherry, S. Adamski, Z. Alam, M. M. Addison, K. T. Byrne, A. Chandra, H. C. Descamps, N. Han, Y. Kaminskiy, S. C. Kammerman, J. Kim, A. R. Greenplate, J. T. Hamilton, N. Markosyan, J. H. Noll, D. K. Omran, A. Pattekar, E. Perkey, E. M. Prager, D. Poeschl, A. Rennels, J. B. Shah, J. S. Shilan, N. Wilhausen, A. N. Vanderbeck; UPenn COVID Processing Unit<sup>‡</sup>, mRNA vaccines induce durable immune memory to SARS-CoV-2 and variants of concern. *Science* 10.1126/science.abm0829 (2021). [doi:10.1126/science.abm0829](https://doi.org/10.1126/science.abm0829) [Medline](#)
36. K. B. Pouwels, E. Pritchard, P. C. Matthews, N. Stoesser, D. W. Eyre, K.-D. Vihta, T. House, J. Hay, J. I. Bell, J. N. Newton, J. Farrar, D. Crook, D. Cook, E. Rourke, R. Studley, T. E. A. Peto, I. Diamond, A. S. Walker, Effect of Delta variant on viral burden and vaccine effectiveness against new SARS-CoV-2 infections in the UK. *Nat. Med.* 10.1038/s41591-021-01548-7 (2021). [doi:10.1038/s41591-021-01548-7](https://doi.org/10.1038/s41591-021-01548-7) [Medline](#)
37. R. M. Anderson, C. Vegvari, T. D. Hollingsworth, L. Pi, R. Maddren, C. W. Ng, R. F. Baggaley, The SARS-CoV-2 pandemic: Remaining uncertainties in our understanding of the epidemiology and transmission dynamics of the virus, and challenges to be overcome. *Interface Focus* **11**, 20210008 (2021). [doi:10.1098/rsfs.2021.0008](https://doi.org/10.1098/rsfs.2021.0008)
38. D. W. Eyre *et al.*, The impact of SARS-CoV-2 vaccination on Alpha & Delta variant transmission. *medRxiv*, 2021.2009.2028.21264260 (2021). [doi:10.1101/2021.09.28.21264260](https://doi.org/10.1101/2021.09.28.21264260).

39. M. J. M. Niesen *et al.*, COVID-19 vaccines dampen genomic diversity of SARS-CoV-2: Unvaccinated patients exhibit more antigenic mutational variance. *medRxiv*, 2021.2007.2001.21259833 (2021). doi:10.1101/2021.07.01.21259833.
40. C. H. Sudre, B. Murray, T. Varsavsky, M. S. Graham, R. S. Penfold, R. C. Bowyer, J. C. Pujol, K. Klaser, M. Antonelli, L. S. Canas, E. Molteni, M. Modat, M. Jorge Cardoso, A. May, S. Ganesh, R. Davies, L. H. Nguyen, D. A. Drew, C. M. Astley, A. D. Joshi, J. Merino, N. Tsereteli, T. Fall, M. F. Gomez, E. L. Duncan, C. Menni, F. M. K. Williams, P. W. Franks, A. T. Chan, J. Wolf, S. Ourselin, T. Spector, C. J. Steves, Attributes and predictors of long COVID. *Nat. Med.* **27**, 626–631 (2021). doi:10.1038/s41591-021-01292-y [Medline](#)
41. B. van den Borst, Recovery after Covid-19. *Lancet Reg. Health West. Pac.* **12**, 100208 (2021). doi:10.1016/j.lanwpc.2021.100208 [Medline](#)
42. J. L. Hirschtick, A. R. Titus, E. Slocum, L. E. Power, R. E. Hirschtick, M. R. Elliott, P. McKane, N. L. Fleischer, Population-based estimates of post-acute sequelae of SARS-CoV-2 infection (PASC) prevalence and characteristics. *Clin. Infect. Dis.* 10.1093/cid/ciab408 (2021). [Medline](#)
43. R. L. Atmar *et al.*, Heterologous SARS-CoV-2 Booster Vaccinations – Preliminary Report. *medRxiv*, 2021.2010.2010.21264827 (2021). doi:10.1101/2021.10.10.21264827.
44. L. SAAD., Americans Getting Out More, but Cautiously (2021). Accessed October 22, 2021. <https://news.gallup.com/poll/350666/americans-getting-cautiously.aspx>
45. K. L. Bajema, R. M. Dahl, M. M. Prill, E. Meites, M. C. Rodriguez-Barradas, V. C. Marconi, D. O. Beenhouwer, S. T. Brown, M. Holodniy, C. Lucero-Obusan, G. Rivera-Dominguez, R. G. Morones, A. Whitmire, E. B. Goldin, S. L. Evener, M. Tremarelli, S. Tong, A. J. Hall, S. J. Schrag, M. McMorrow, M. Kobayashi, J. R. Verani, D. Surie, G. Ahmadi-Izadi, J. Burnette, R. Deovic, L. Epstein, A. Hartley, E. Morales, T. Tanner, N. Patel, A. Tunson, K. Elliot, I. Graham, D. Lama, I. Pena, A. Perea, G. A. Perez, J. Simelane, S. Smith, G. Tallin, A. Tisi, A. A. Lopez, M. C. Gonzalez, B. Lengi, D. Mansouri, M. V. Tamez, B. Aryanfar, I. Lee-Chang, C. Jeong, A. Matolek, C. Mendoza, A. Poteshkina, S. Naeem, M. Agrawal, J. Lopez, T. Peters, G. Kudryavtseva, J. Cates, J. M. Folster, A. Kambhampati, A. Kelleher, Y. Li, H. J. Ng, Y. Tao; SUPERNOVA COVID-19; Surveillance Group; Surveillance Platform for Enteric and Respiratory Infectious Organisms at the VA (SUPERNOVA) COVID-19 Surveillance Group, Effectiveness of COVID-19 mRNA Vaccines Against COVID-19-Associated Hospitalization - Five Veterans Affairs Medical Centers, United States, February 1-August 6, 2021. *MMWR Morb. Mortal. Wkly. Rep.* **70**, 1294–1299 (2021). doi:10.15585/mmwr.mm7037e3 [Medline](#)
46. P. Cirillo, N. Krigbaum, Code for Methods for SARS-CoV-2 Vaccine Protection and Deaths among U.S. Veterans during 2021. Zenodo (2021); doi:10.5281/zenodo.5609444.
